# Supplementary material for: RNA interference and validation of reference genes for gene expression analyses using qPCR in southern pine beetle, Dendroctonus frontalis
Source: PubMed Central journal article supplement (PMC6449504; doi:10.1038/s41598-019-42072-6), 2019-04-04
Supplement: 41598_2019_42072_MOESM1_ESM.pdf [file 41598_2019_42072_MOESM1_ESM.pdf]

1 **RNA interference and validation of reference genes for**  
2 **gene expression analyses using RT-qPCR in southern pine**  
3 **beetle, *Dendroctonus frontalis***

4 Bethany R. Kyre<sup>1</sup>, Thais B. Rodrigues<sup>1,2</sup> & Lynne K. Rieske<sup>1\*</sup>

5 \*Corresponding author ([Lrieske@uky.edu](mailto:Lrieske@uky.edu))

6 <sup>1</sup>University of Kentucky Department of Entomology, S-225 Ag North, Lexington, KY 40546-0091

7 <sup>2</sup>Current address Greenlight BioSciences, Inc., Medford, MA

8

9 **Supplemental Materials**

10

11 **Final ranking of candidate reference genes from light treated beetles according to values**  
 12 **given by GeNorm, NormFinder, BestKeeper, and delta Ct and a comprehensive ranking by**  
 13 **RefFinder. M: gene expression stability; R: ranking; SV stability value; SD: standard**  
 14 **deviation; GM: Geomean value.**

15

| Gene         | GeNorm |   | NormFinder |   | BestKeeper |   | delta-CT |   | Comprehensive |   |
|--------------|--------|---|------------|---|------------|---|----------|---|---------------|---|
|              | M      | R | SV         | R | SD         | R | SD       | R | GM            | R |
| <i>rps18</i> | 0.349  | 1 | 0.424      | 3 | 0.22       | 1 | 0.63     | 3 | 1.73          | 2 |
| <i>ef1a</i>  | 0.522  | 4 | 0.271      | 2 | 0.54       | 5 | 0.56     | 2 | 3.16          | 4 |
| <i>rpl13</i> | 0.435  | 2 | 0.441      | 4 | 0.23       | 2 | 0.63     | 4 | 3.13          | 3 |
| <i>ak</i>    | 0.619  | 6 | 0.662      | 8 | 0.76       | 8 | 0.77     | 7 | 7.48          | 8 |
| <i>sdf</i>   | 0.578  | 5 | 0.489      | 5 | 0.65       | 7 | 0.67     | 5 | 5.69          | 6 |
| <i>rpl32</i> | 0.349  | 1 | 0.259      | 1 | 0.25       | 3 | 0.55     | 1 | 1.32          | 1 |
| <i>tub</i>   | 0.476  | 3 | 0.514      | 6 | 0.37       | 4 | 0.68     | 6 | 4.9           | 5 |
| <i>ubiq</i>  | 0.659  | 7 | 0.651      | 7 | 0.55       | 6 | 0.78     | 8 | 7.2           | 7 |

16

17 **Final ranking of candidate reference genes from temperature treated beetles according to**  
 18 **values given by GeNorm, NormFinder, BestKeeper, and delta Ct and a comprehensive**  
 19 **ranking by RefFinder. M: gene expression stability; R: ranking; SV stability value; SD:**  
 20 **standard deviation; GM: Geomean value.**

21

| Gene         | GeNorm |   | NormFinder |   | BestKeeper |   | delta-CT |   | Comprehensive |   |
|--------------|--------|---|------------|---|------------|---|----------|---|---------------|---|
|              | M      | R | SV         | R | SD         | R | SD       | R | GM            | R |
| <i>rps18</i> | 0.177  | 1 | 0.256      | 2 | 0.72       | 1 | 0.43     | 2 | 1.57          | 1 |
| <i>ef1a</i>  | 0.414  | 6 | 0.423      | 7 | 1.15       | 8 | 0.51     | 5 | 7.24          | 8 |
| <i>rpl13</i> | 0.27   | 2 | 0.205      | 1 | 0.78       | 4 | 0.42     | 1 | 1.86          | 2 |
| <i>ak</i>    | 0.386  | 4 | 0.285      | 4 | 1.01       | 6 | 0.42     | 1 | 3.94          | 4 |
| <i>sdf</i>   | 0.366  | 3 | 0.289      | 5 | 0.99       | 5 | 0.44     | 3 | 4.73          | 5 |
| <i>rpl32</i> | 0.472  | 7 | 0.6        | 8 | 0.75       | 3 | 0.65     | 6 | 6.26          | 7 |
| <i>tub</i>   | 0.177  | 1 | 0.282      | 3 | 0.73       | 2 | 0.44     | 3 | 2.21          | 3 |
| <i>ubiq</i>  | 0.402  | 5 | 0.355      | 6 | 1.02       | 7 | 0.47     | 4 | 6.24          | 6 |

22

23 **Final ranking of candidate reference genes from male and female beetles according to**  
 24 **values given by GeNorm, NormFinder, BestKeeper, and delta Ct and a comprehensive**  
 25 **ranking by RefFinder. M: gene expression stability; R: ranking; SV stability value; SD:**  
 26 **standard deviation; GM: Geomean value.**

27

| Gene         | GeNorm |   | NormFinder |   | BestKeeper |   | delta-CT |   | Comprehensive |   |
|--------------|--------|---|------------|---|------------|---|----------|---|---------------|---|
|              | M      | R | SV         | R | SD         | R | SD       | R | GM            | R |
| <i>rps18</i> | 0.329  | 2 | 0.167      | 1 | 0.55       | 2 | 0.59     | 1 | 1.57          | 1 |
| <i>ef1a</i>  | 0.356  | 3 | 0.305      | 2 | 0.79       | 6 | 0.62     | 4 | 3.72          | 5 |
| <i>rpl13</i> | 0.449  | 5 | 0.364      | 5 | 0.41       | 1 | 0.72     | 5 | 3.5           | 4 |
| <i>ak</i>    | 0.317  | 1 | 0.317      | 3 | 0.67       | 3 | 0.61     | 2 | 2.06          | 2 |
| <i>sdf</i>   | 0.376  | 4 | 0.607      | 7 | 0.91       | 8 | 0.73     | 6 | 6.4           | 6 |
| <i>rpl32</i> | 0.317  | 1 | 0.341      | 4 | 0.7        | 4 | 0.62     | 3 | 2.63          | 3 |
| <i>tub</i>   | 0.525  | 6 | 0.524      | 6 | 0.83       | 7 | 0.81     | 7 | 6.74          | 7 |
| <i>ubiq</i>  | 0.784  | 7 | 1.521      | 8 | 0.72       | 5 | 1.56     | 8 | 7.11          | 8 |

28

29 **Final ranking of candidate reference genes from all treatments according to values given by**  
 30 **GeNorm, NormFinder, BestKeeper, and delta Ct and a comprehensive ranking by**  
 31 **RefFinder. M: gene expression stability; R: ranking; SV stability value; SD: standard**  
 32 **deviation; GM: Geomean value.**

33

| Gene         | GeNorm |   | NormFinder |   | BestKeeper |   | delta-Ct |   | Comprehensive |   |
|--------------|--------|---|------------|---|------------|---|----------|---|---------------|---|
|              | M      | R | SV         | R | SD         | R | SD       | R | GM            | R |
| <i>rps18</i> | 0.475  | 4 | 0.297      | 1 | 0.59       | 1 | 0.61     | 2 | 1.68          | 1 |
| <i>ef1a</i>  | 0.362  | 2 | 0.314      | 2 | 0.8        | 5 | 0.6      | 1 | 2.34          | 2 |
| <i>rpl13</i> | 0.505  | 3 | 0.348      | 3 | 0.53       | 2 | 0.63     | 3 | 3.08          | 3 |
| <i>ak</i>    | 0.312  | 1 | 0.43       | 4 | 0.83       | 6 | 0.64     | 4 | 3.13          | 4 |
| <i>sdf</i>   | 0.312  | 1 | 0.464      | 6 | 0.92       | 8 | 0.66     | 5 | 4.12          | 5 |
| <i>rpl32</i> | 0.517  | 5 | 0.434      | 5 | 0.64       | 4 | 0.66     | 5 | 4.95          | 6 |
| <i>tub</i>   | 0.556  | 6 | 0.485      | 7 | 0.63       | 3 | 0.71     | 6 | 5.66          | 7 |
| <i>ubiq</i>  | 0.71   | 7 | 1.103      | 8 | 0.89       | 7 | 1.17     | 7 | 7.74          | 8 |

34
